# Supplementary material for: Incorporating high acidity cations in Co-free BiFeO3-based air electrodes for enhancing their electrocatalytic activity and durability in reversible solid oxide cells
Source: Royal Society of Chemistry journal article supplement (doi:10.1039/d4ta07490d), 2024-12-24
Supplement: d4ta07490d1.pdf [file d4ta07490d1.pdf]

**Incorporating high acidity cation on Co-free BiFeO<sub>3</sub>-based air  
electrodes for enhancing electrocatalytic activity and durability in  
reversible solid oxide cells**

Shun Wang<sup>a</sup>, Wen Jiang<sup>a</sup>, Yifeng Zheng<sup>b\*</sup>

<sup>a</sup> College of Ceramics, Wuxi Vocational Institute of Arts & Technology, No. 99 South Jingyi  
Road, Yixing, 214200, Jiangsu, China

<sup>b</sup> College of Materials Science and Engineering, Nanjing Tech University, No. 30 Puzhu Road(S),  
Nanjing, 211816, Jiangsu, China

---

\* Corresponding author.  
Email address: zhengyifeng@njtech.edu.cn (Y. Zheng)

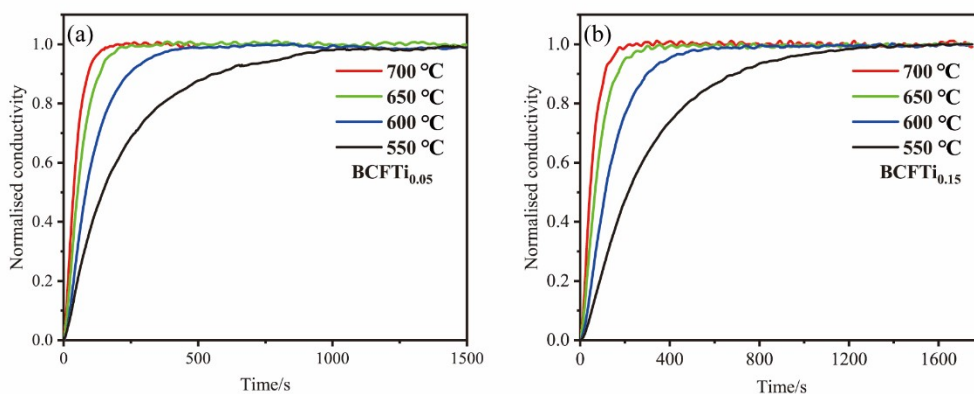

Fig.S1 ECR curves of (a) $\text{BCFTi}_{0.05}$  and (b)  $\text{BCFTi}_{0.15}$  samples measured from 550 to 700 °C with an oxygen partial pressure changed from 0.1 to 0.21 atm.

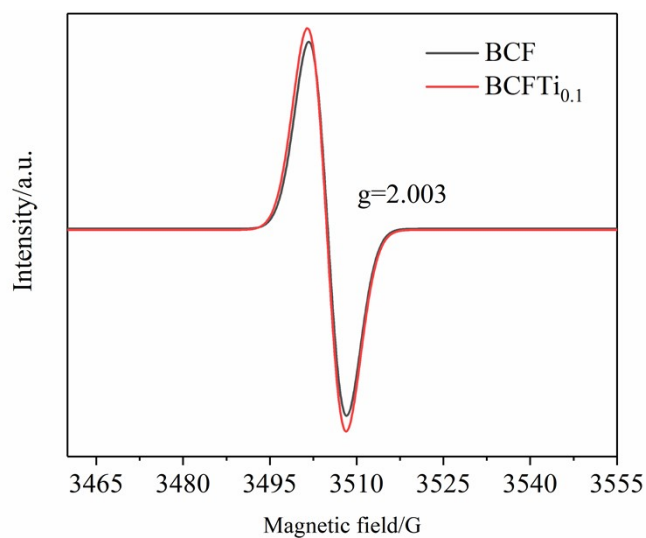

Fig. S2 EPR spectra of BCF and  $\text{BCFTi}_{0.1}$  powders

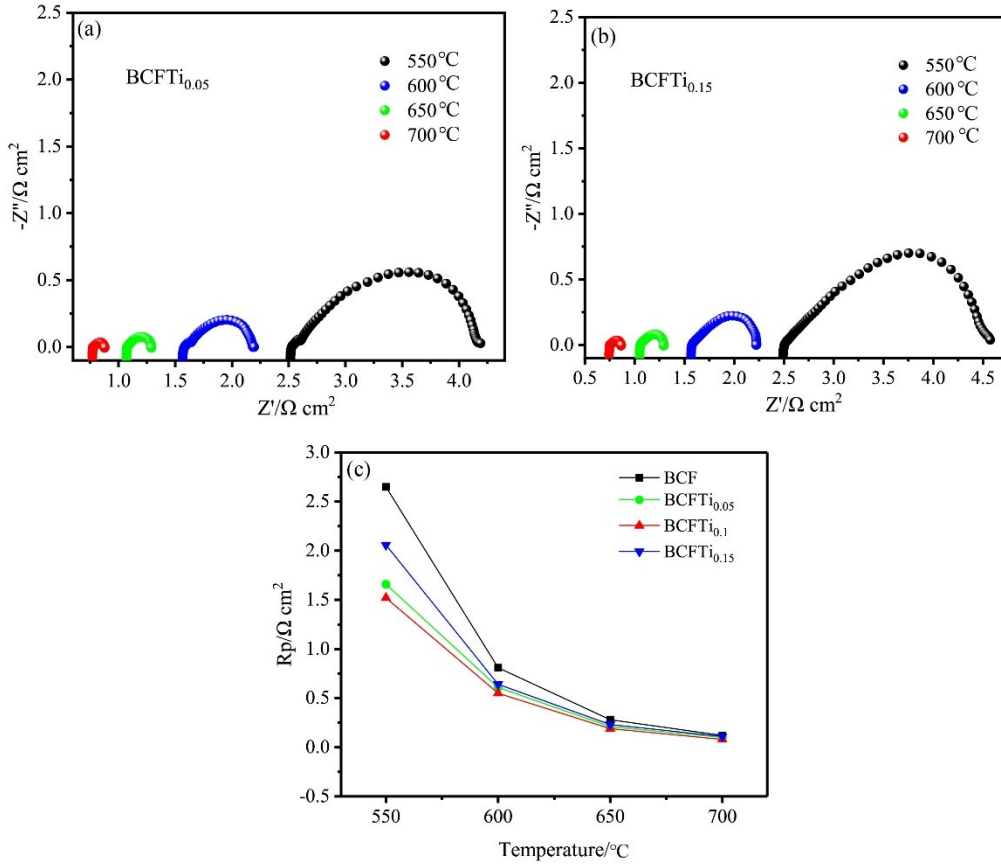

Fig.S3 EIS plots of (a) BCF<sub>0.05</sub> and (b) BCFTi<sub>0.15</sub> symmetrical cells measured at 550-700 °C in air; (c) The  $R_p$  values for BCFTi<sub>x</sub> cathodes measured at 550-700 °C in air.

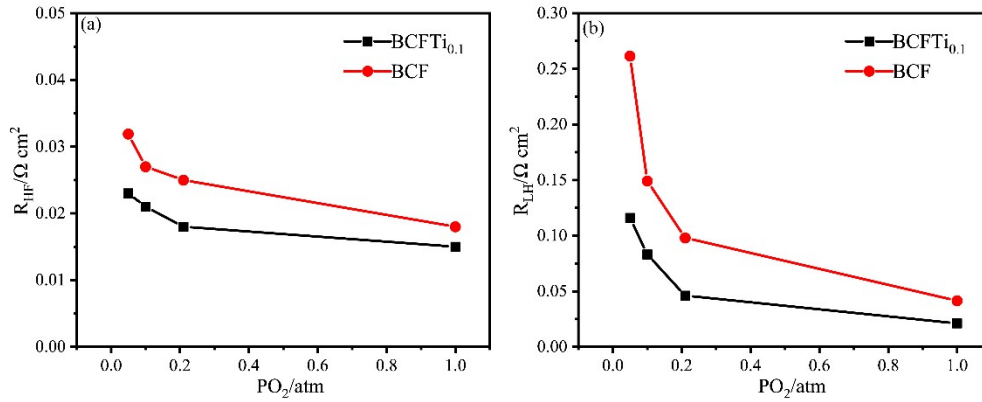

Fig.S4 (a) $R_{HF}$  and (b) $R_{LF}$  of BCF and BCFTi<sub>0.1</sub> cells on different  $pO_2$  at 700 °C.

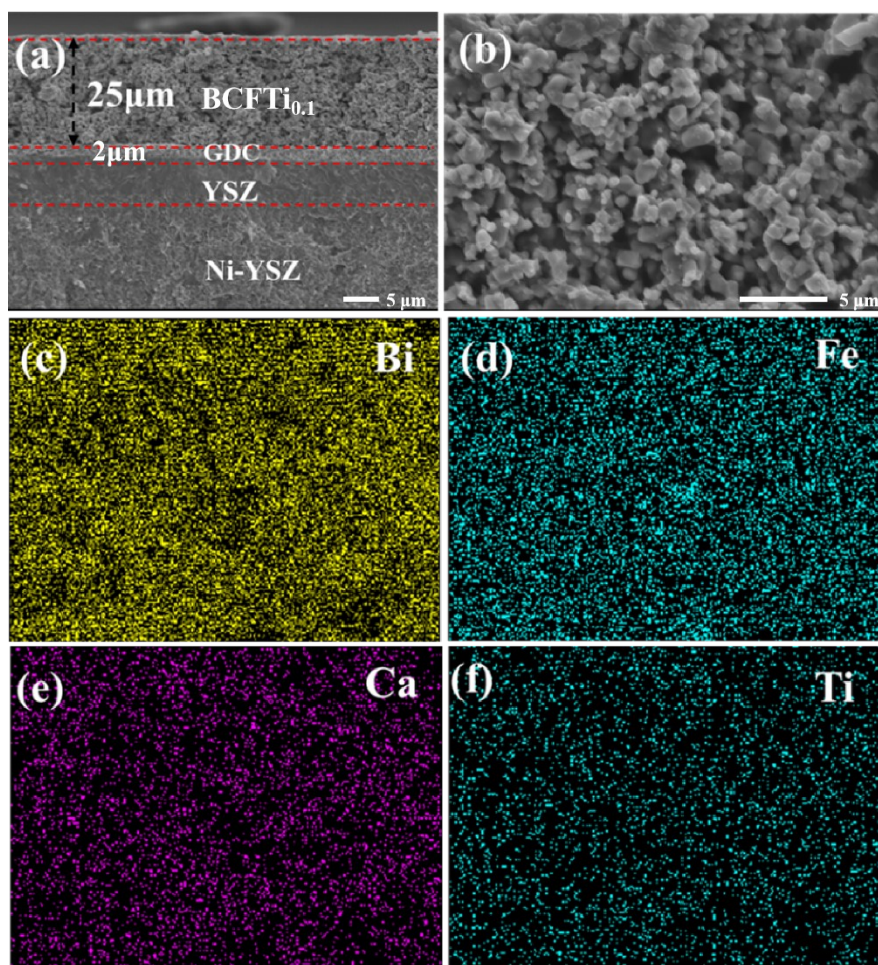

Fig. S5 SEM images of (a) Ni-YSZ/YSZ/GDC/BCFTi<sub>0.1</sub> single cell, (b) BCFTi<sub>0.1</sub> electrode surface morphology; EDS results of BCFTi<sub>0.1</sub> electrode (c) Bi, (d) Fe, (e) Ca and (f) Ti.

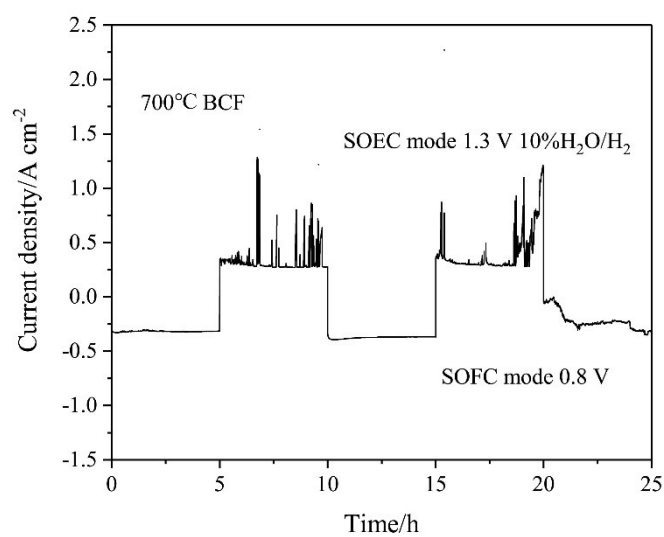

Fig.S6 Continuous cyclical operation between the SOFC mode (at 0.8 V) and the SOEC mode (at 1.3 V) at 700°C for BCF single cell.

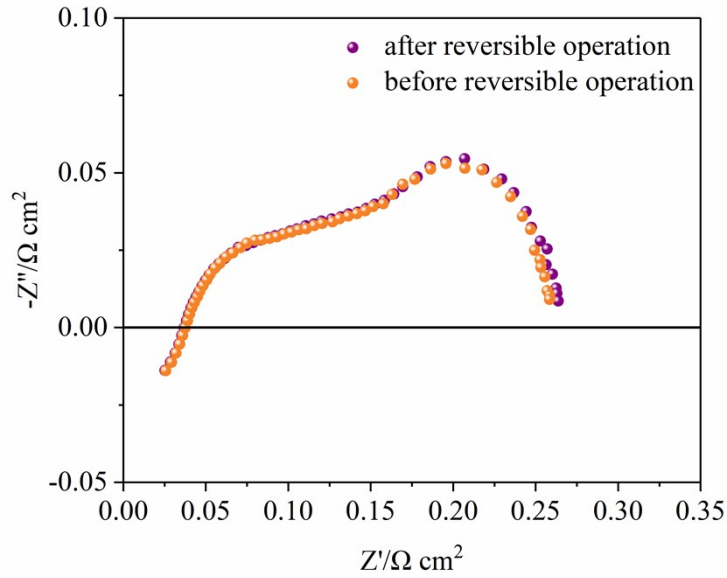

Fig. S7 EIS of the BCFTi<sub>0.1</sub> single cell before and after the continuous cyclical operation.

Table S1 Lattice parameters of BCFTi<sub>x</sub>O<sub>3-δ</sub> (x=0, 0.05, 0.1, 0.15) samples

| Samples               | Space group | a=b=c   | ωRp  | Rp   | χ <sup>2</sup> |
|-----------------------|-------------|---------|------|------|----------------|
| BCF                   | Pm-3m       | 3.91689 | 8.14 | 5.23 | 4.56           |
| BCFTi <sub>0.05</sub> | Pm-3m       | 3.91365 | 4.21 | 2.33 | 2.83           |
| BCFTi <sub>0.1</sub>  | Pm-3m       | 3.92097 | 7.82 | 5.63 | 3.08           |
| BCFTi <sub>0.15</sub> | Pm-3m       | 3.92724 | 6.89 | 3.44 | 3.47           |

Table S2 Comparison of the Rp values of symmetrical cells with various Fe-based or Co-based perovskite materials measured at 700 °C in air

| Cathode                                                                                                             | Electrolyte (μm) | Rp values (Ω cm <sup>2</sup> ) | Reference |
|---------------------------------------------------------------------------------------------------------------------|------------------|--------------------------------|-----------|
| BCFTi <sub>0.1</sub>                                                                                                | GDC(~500)        | 0.064                          | This work |
| Pr <sub>0.2</sub> Ba <sub>0.2</sub> Sr <sub>0.2</sub> La <sub>0.2</sub> Ca <sub>0.2</sub> CoO <sub>3-δ</sub>        | LSGM (250)       | ~0.08                          | 1         |
| Sr <sub>0.5</sub> Bi <sub>0.5</sub> FeO <sub>3-δ</sub>                                                              | GDC(300)         | ~0.25                          | 2         |
| Sr <sub>0.5</sub> Bi <sub>0.4</sub> Ca <sub>0.1</sub> FeO <sub>3-δ</sub>                                            | GDC(300)         | 0.13                           | 2         |
| Bi <sub>0.5</sub> Sr <sub>0.5</sub> Fe <sub>0.85</sub> Ti <sub>0.15</sub> O <sub>3-δ</sub>                          | GDC(~300)        | 0.085                          | 3         |
| Sm <sub>2</sub> Ba <sub>3</sub> Co <sub>2</sub> Fe <sub>3</sub> O <sub>15-δ</sub>                                   | LSGM (~280)      | 0.06                           | 4         |
| SmBaCo <sub>0.8</sub> Fe <sub>1.2</sub> O <sub>5+δ</sub>                                                            | LSGM (~280)      | 0.108                          | 4         |
| SrCo <sub>0.8</sub> Ti <sub>0.2</sub> O <sub>3-δ</sub>                                                              | LSGM(~200)       | ~0.062                         | 5         |
| Bi <sub>0.5</sub> Sr <sub>0.5</sub> FeO <sub>3-δ</sub> -Ce <sub>0.9</sub> Gd <sub>0.1</sub> O <sub>1.95</sub> (7:3) | GDC(300)         | 0.14                           | 6         |
| (La <sub>0.6</sub> Sr <sub>0.4</sub> ) <sub>0.95</sub> Co <sub>0.2</sub> Fe <sub>0.8</sub> O <sub>3-δ</sub>         | LSGM (250)       | 0.091                          | 7         |
| SmBaFe <sub>2</sub> O <sub>5+δ</sub>                                                                                | LSGM (~270)      | 0.154                          | 8         |

Table S3 Comparison in electrochemical performance (FC and EC mode) of BCFTi<sub>0.1</sub> single cell with reported high-performance cells using Co-based or Fe-based air electrodes

| Air Electrode        | Fuel electrode/electrolyte      | MPD (W cm <sup>-2</sup> ) | Current density (A cm <sup>-2</sup> )                                                                     | Reference |
|----------------------|---------------------------------|---------------------------|-----------------------------------------------------------------------------------------------------------|-----------|
| BCFTi <sub>0.1</sub> | Ni-YSZ/YSZ/GDC                  | 1.03 (700 °C)             | 0.9 (700 °C, 70 H <sub>2</sub> O:30 H <sub>2</sub> , 1.3V)                                                | This work |
| PCFC                 | Ni-YSZ/YSZ/GDC                  | 0.493 (700 °C)            | 0.79 (750 °C, 50 H <sub>2</sub> O:50 H <sub>2</sub> , 1.3V)                                               | 9         |
| LSFN-GDC             | Ni-YSZ/YSZ/GDC                  | 0.729 (750 °C)            | 0.53 (750 °C, 50 H <sub>2</sub> O:50 H <sub>2</sub> , 1.3V)                                               | 10        |
| RP-LSCFNMC           | NiO-3YSZ-8YSZ NiO-8YSZ 8YSZ GDC | 0.8 (700 °C)              | 0.76 (700 °C, 60 H <sub>2</sub> O:40 H <sub>2</sub> , 1.3V)                                               | 11        |
| RP-LSC               | NiO-3YSZ-8YSZ NiO-8YSZ 8YSZ GDC | 0.57 (700 °C)             | 0.65 (700 °C, 60 H <sub>2</sub> O:40 H <sub>2</sub> , 1.3V)                                               | 11        |
| BSFTF10              | Ni-YSZ/YSZ/GDC                  | 0.497 (700 °C)            | 0.958 (700°C, 70 CO <sub>2</sub> :30CO, 1.5V)                                                             | 12        |
| LSFN                 | Ni-YSZ/YSZ/GDC                  | 0.4 (700 °C)              | 0.32 (700 °C, 50 CO <sub>2</sub> :50 H <sub>2</sub> , 1.3V)                                               | 13        |
| LSCF-SNDC            | Ni-YSZ/YSZ/SNDC                 | 1.13 (700 °C)             | 1.37 (750 °C, 50 H <sub>2</sub> O:50 H <sub>2</sub> , 1.3V)                                               | 14        |
| LBSNF-GDC            | Ni-YSZ/YSZ/GDC                  | 0.418 (700 °C)            | 0.36 (700 °C, 50 H <sub>2</sub> O:50 H <sub>2</sub> , 1.3V)                                               | 15        |
| NCBC2                | Ni-YSZ/YSZ/GDC                  | ~0.8 (700 °C)             | 0.81 (800 °C, 70 CO <sub>2</sub> :30H <sub>2</sub> , 1.5V, single cell configuration: NCBC2/LSGM/SFM-SDC) | 16        |

PCFC: Pr<sub>0.8</sub>Ca<sub>0.2</sub>Fe<sub>0.8</sub>Co<sub>0.2</sub>O<sub>3-δ</sub>; LSFN-GDC: La<sub>0.6</sub>Sr<sub>0.4</sub>Fe<sub>0.8</sub>Ni<sub>0.2</sub>O<sub>3-δ</sub>-Gd<sub>0.1</sub>Ce<sub>0.9</sub>O<sub>2-δ</sub>; RP-LSCFNMC: La<sub>1.4</sub>Sr<sub>0.6</sub>Co<sub>0.2</sub>Fe<sub>0.2</sub>Ni<sub>0.2</sub>Mn<sub>0.2</sub>Cu<sub>0.2</sub>O<sub>4±δ</sub>; RP-LSC: La<sub>1.4</sub>Sr<sub>0.6</sub>CoO<sub>4±δ</sub>; BSFTF10 : Bi<sub>0.5</sub>Sr<sub>0.5</sub>Fe<sub>0.9</sub>Ta<sub>0.1</sub>O<sub>3-δ</sub>F<sub>0.1</sub>; LSFN: La<sub>0.6</sub>Sr<sub>0.4</sub>Fe<sub>0.9</sub>Nb<sub>0.1</sub>O<sub>3-δ</sub>; LSCF-SNDC: La<sub>0.6</sub>Sr<sub>0.4</sub>Co<sub>0.2</sub>Fe<sub>0.8</sub>O<sub>3-δ</sub>-Sm<sub>0.075</sub>Nd<sub>0.075</sub>Ce<sub>0.85</sub>O<sub>2-δ</sub>; LBSNF-GDC: La<sub>0.8-x</sub>Bi<sub>x</sub>Sr<sub>0.2</sub>Ni<sub>0.2</sub>Fe<sub>0.8</sub>O<sub>3-δ</sub>-Gd<sub>0.1</sub>Ce<sub>0.9</sub>O<sub>2-δ</sub>; NCBC2: Nd<sub>0.8</sub>Ca<sub>0.2</sub>BaCo<sub>2</sub>O<sub>5+δ</sub>; LSGM: La<sub>0.9</sub>Sr<sub>0.1</sub>Ga<sub>0.8</sub>Mg<sub>0.2</sub>O<sub>3-δ</sub>; SFM-SDC: Sr<sub>2</sub>Fe<sub>1.5</sub>Mo<sub>0.5</sub>O<sub>6-δ</sub>-Ce<sub>0.8</sub>Sm<sub>0.2</sub>O<sub>1.9</sub>.

#### Reference:

- 1 He, F.; Zhu, F.; Liu, D.; Zhou, Y.; Sasaki, K.; Choi, Y.; Liu, M.; Chen, Y. *Mater. Today*, 2023, **63**, 89-98.
- 2 Gao, J.; Liu, Y.; Xia, T.; Sun, L.; Zhao, H.; Wei, B.; Li, Q. *Sep. Purif. Technol.*, 2023, **311**, 123267.
- 3 Gao, J.; Li, Q.; Xia, W.; Sun, L.; Huo, L.-H.; Zhao, H. *ACS Sustainable Chem. Eng.*, 2019, **7**, 18647-18656.

- 4 Sun, Z.; Shen, Z.; Du, Z.; Zhang, Y.; Gong, Y.; Zhang, M.; Wang, K.; Świerczek, K.; Zeng, J.; Zhao, H. *Adv. Funct. Mater.*, 2024, **34**, 2403312.
- 5 Dang, X.; Li, T.; Jiang, Y.; Gao, Z.; Hua, Y.; Su, H. *J. Power Sources*, 2024, **603**, 234448.
- 6 Gao, J.; Li, Q.; Guo, M.; Sun, L.; Huo, L.; Zhao, H. *Ceram. Int.*, 2021, **47**, 748-754.
- 7 Zhu, F.; He, F.; Xu, K.; Chen, Y. *Sci. China Mater.*, 2022, **65**, 3043-3052.
- 8 Zhang, M.; Du, Z.; Sun, Z.; Zhao, H. *J. Mater. Chem. A*, 2023, **11**, 21645-21654.
- 9 Li, Y.; Tian, Y.; Li, J.; Pu, J.; Chi, B. *J. Power Sources*, 2022, **528**, 231202.
- 10 Tian, Y.; Wang, W.; Liu, Y.; Zhang, L.; Jia, L.; Yang, J.; Chi, B.; Pu, J.; Li, J. *ACS Appl. Energy Mater.*, 2019, **2**, 3297-3305.
- 11 Li, X.; Chen, T.; Wang, C.; Sun, N.; Zhang, G.; Zhou, Y.; Wang, M.; Zhu, J.; Xu, L.; Wang, S. *Adv. Funct. Mater.*, 2024, 2411216.
- 12 Ye, H.; Feng, Y.; Shan, P.; Qian, B.; Ge, L.; Chen, H.; Zheng, Y. *Chem. Eng. J.*, 2024, **499**, 156105.
- 13 Guan, C.; Wang, Y.; Chen, K.; Xiao, G.; Lin, X.; Zhou, J.; Song, S.; Wang, J.-Q.; Zhu, Z.; Zhou, X.-D. *Mater. Lett.*, 2019, **245**, 114-117.
- 14 Park, J.H.; Jung, C.H.; Kim, K.J.; Kim, D.; Shin, H.R.; Hong, J.-E.; Lee, K.T. *ACS Appl. Mater. Interfaces*, 2021, **13**, 2496-2506.
- 15 Zheng, G.; Zhang, G.; Liu, K.; Huang, Z.; Chen, T.; Zhou, J.; Wang, S. *Int. J. Hydrogen Energy*, 2023, **48**, 12571-12580.
- 16 Li, J.; Sun, N.; Liu, X.; Shen, Y.; Wang, F.; Li, J.; Shi, K.; Jin, F. *J. Alloys Compd.*, 2022, **913**, 165245.
